# Supplementary material for: Salt sealing strategy to prepare N,O-codoped porous bio-carbon derived from Ephedra Herb for supercapacitors
Source: Royal Society of Chemistry journal article supplement (doi:10.1039/d1nj03245c), 2021-01-01
Supplement: d1nj03245c1.pdf [file d1nj03245c1.pdf]

**Supporting Information**

**Salt sealing strategy to prepare N, O-codoped  
porous bio-carbon derived from Ephedra Herb for  
supercapacitor**

*Jing-Jiang Liu<sup>‡\*</sup>, Zhi-Wei Yan<sup>‡</sup>, Rui-Xue Kang<sup>\*</sup>, Jin-Hui Wang and Xun Feng*

Criminal Science Applied Technology Collaborative Innovation Centre, Gansu Police

Vocational College, Lanzhou 730046, 730299, Gansu, China.

<sup>‡</sup>These authors contributed equally to this work.

<sup>\*</sup>Corresponding authors. liujingjiang214@163.com (J. Liu); k.ruixue@163.com (R. Kang)

## Electrochemical Measurements

### 1. Fabrication of three-electrode system

In a three-electrode system, the tested sample was loaded onto a normal the glassy carbon electrode (5 mm diameter). Generally, accurately weighed (4.0 mg) sample was ultrasonically dispersed in 0.400 mL Nafion solution (0.25%, DuPont, USA). 8.0  $\mu\text{L}$  of above suspension was dropped onto the working electrode surface and dried at room-temperature (about 0.4  $\text{mg cm}^{-2}$ ). All of the electrodes were immersed in 6  $\text{mol L}^{-1}$  KOH electrolyte. The electrochemical performances were investigated by cyclic voltammetry (CV) and galvanostatic charge/discharge measurements from CHI 660E electrochemical workstation. The charge-discharge cycle stability was employed on a LAND CT2001A (Wuhan Land Instrument Company, China).

### 2. Fabrication of two-electrode supercapacitor

During the two-electrodes test, the electrodes were made by mixing  $\text{S}_{12}$  (80 wt%), polyvinylidene fluoride (PVDF, 10 wt%) and commercial carbon black (10 wt%). The mixture was coated on nickel foam and then pressed at 15 MPa followed by drying at 393 K for 12 h. A button-type supercapacitor was assembled with two similar carbon electrodes (about 2.6  $\text{mg cm}^{-2}$ ) separated by a polypropylene membrane in 6 M KOH electrolyte and 1 M  $\text{Li}_2\text{SO}_4$ . The charge-discharge performance was measured using a CHI 760E electrochemical workstation (CH Instrument, Shanghai, China). The specific capacitance of the  $\text{S}_{122}$  material (C, in  $\text{F g}^{-1}$ ) was calculated based on the discharge curve according to equation (1).

$$C = \frac{2I}{m \frac{\Delta V}{\Delta t}} \quad (1)$$

Where  $I$  is the discharge current (A),  $\frac{\Delta V}{\Delta t}$  ( $V s^{-1}$ ) is the slope obtained by fitting a straight line to the discharge voltage, and  $m$  is the mass (g) of active material in a single electrode.

The energy density ( $E$ , in  $W h kg^{-1}$ ) and average power density ( $P$ , in  $W kg^{-1}$ ) were calculated according to equation (2) and (3).

$$E = \frac{1}{2 * 4 * 3.6} C V^2 \quad (2)$$

$$P = \frac{E}{\Delta t d} \quad (3)$$

Where  $C$  is the specific capacitance of a single electrode in a two electrode supercapacitor ( $F g^{-1}$ ), and  $V$  is the usable voltage after IR drop (V), and  $\Delta t d$  is the discharge time (h). [S1-S5]

### 3. Materials Characterization

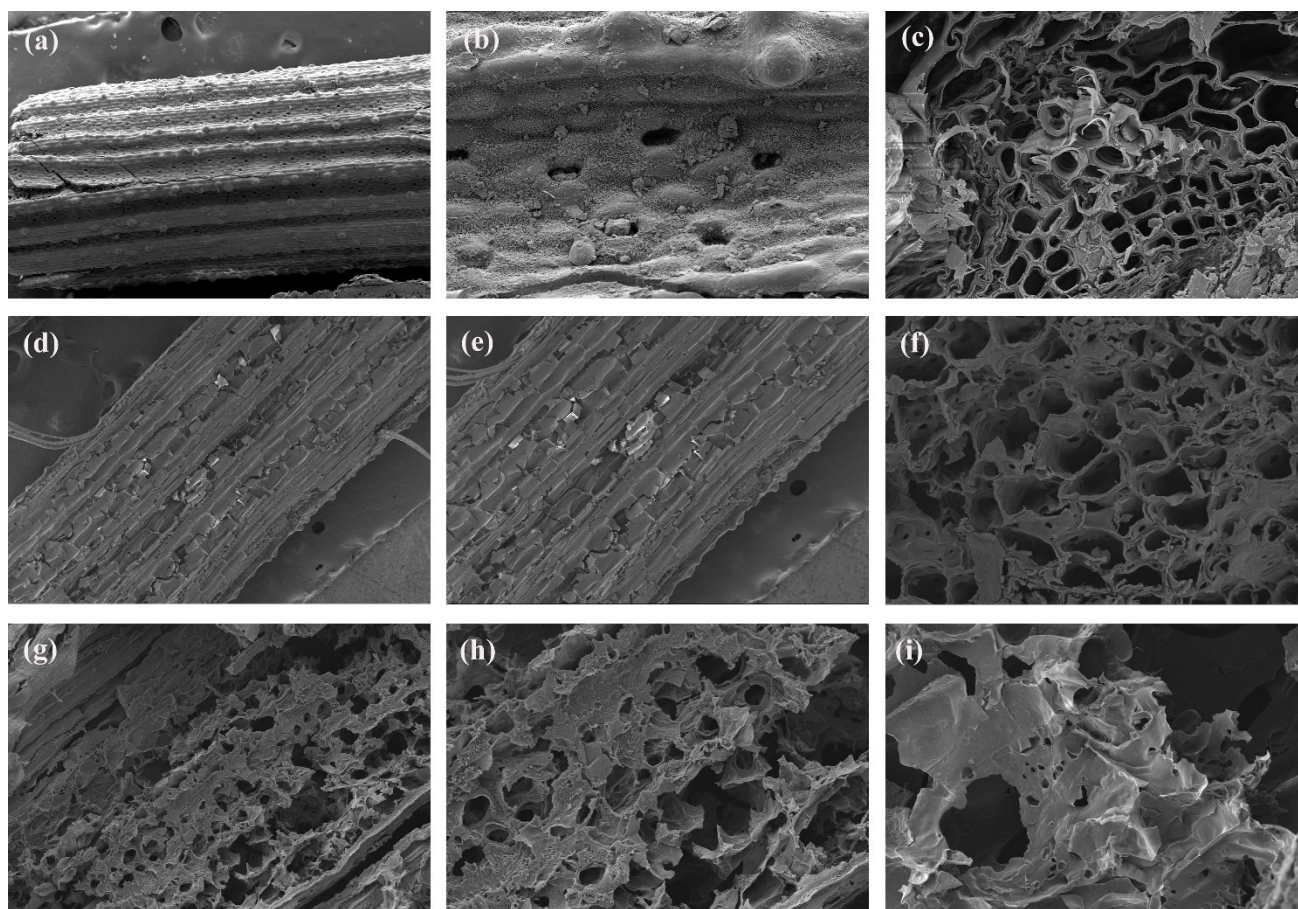

**Fig. S1** SEM and HR-SEM images of the S<sub>10</sub> (a, b, c), S<sub>11</sub> (d, e, f) and S<sub>12</sub> (g, h, i).

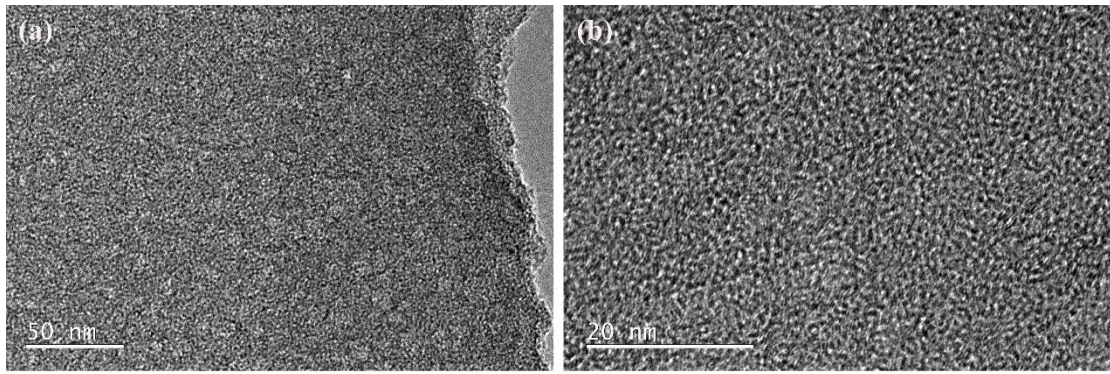

**Fig. S2** TEM and HR-TEM images of the S<sub>12</sub> (a, b).

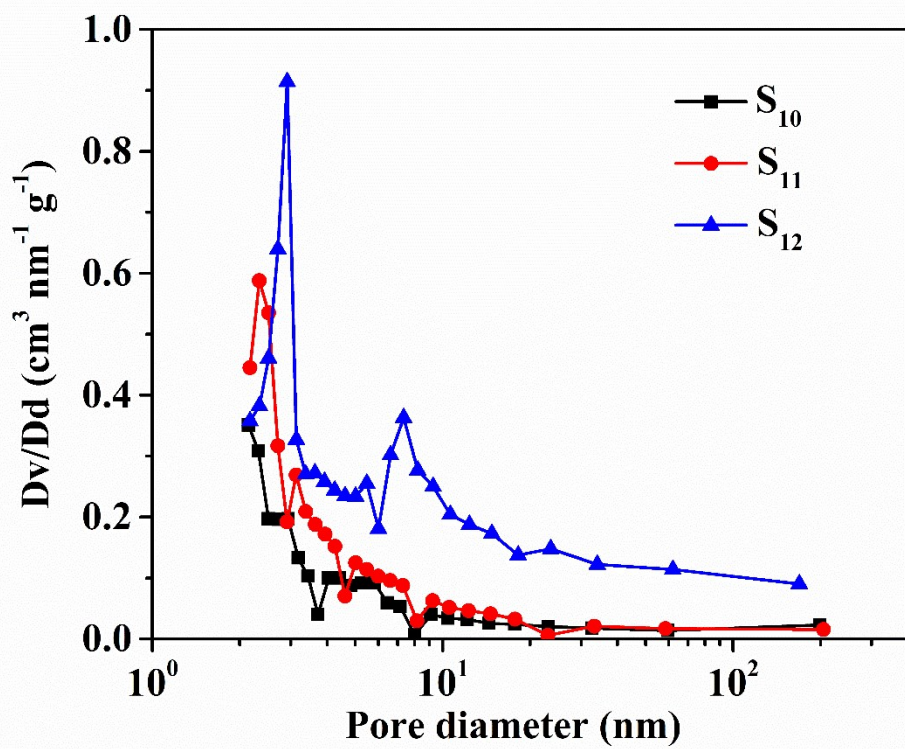

Fig. S3 Pore size distribution of  $S_{10}$ ,  $S_{11}$  and  $S_{12}$ .

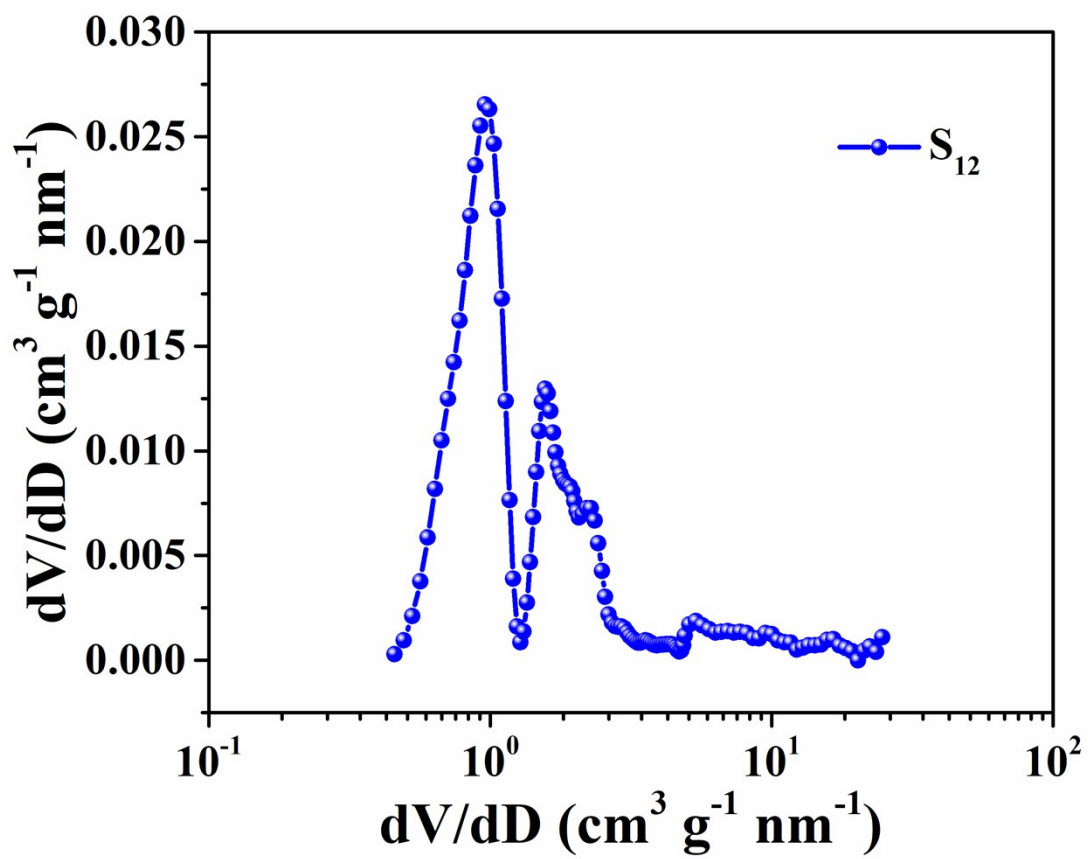

**Fig. S4** The  $S_{12}$  samples was further verified by the density functional theory (DFT) method.

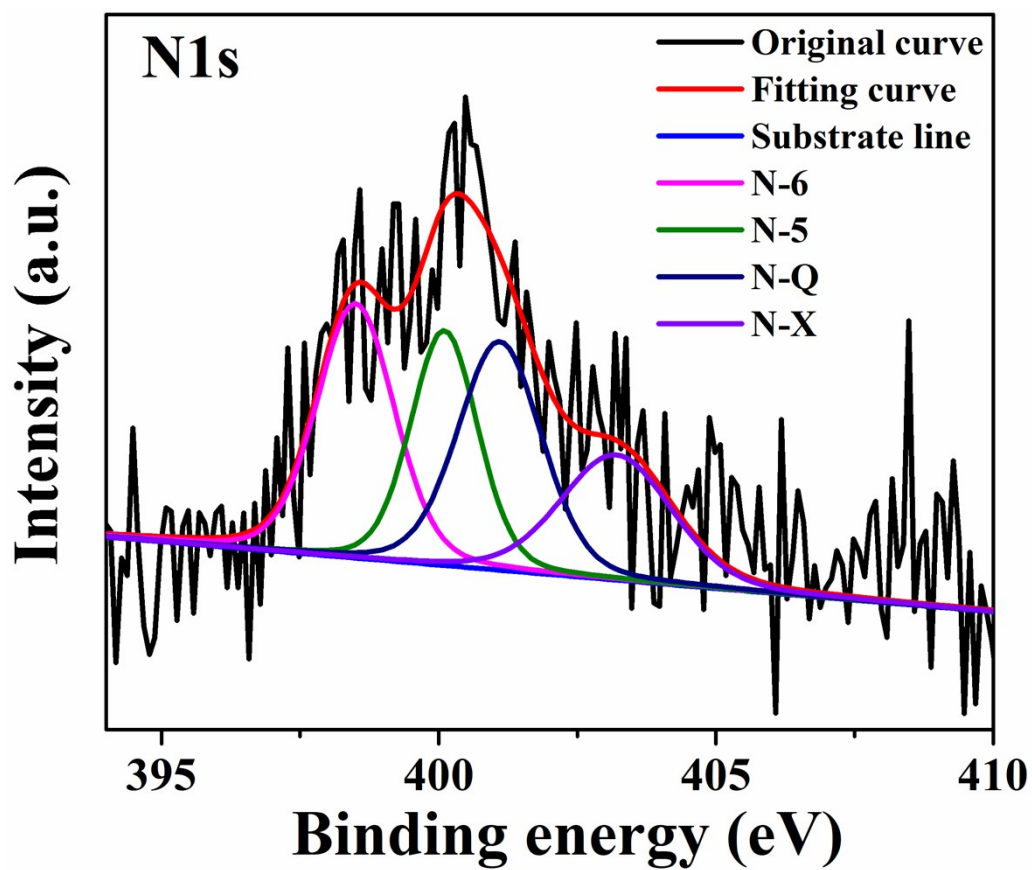

Fig. S5 High-resolution X-ray photoelectron spectroscopy (XPS) of N1s region for S<sub>12</sub> sample.

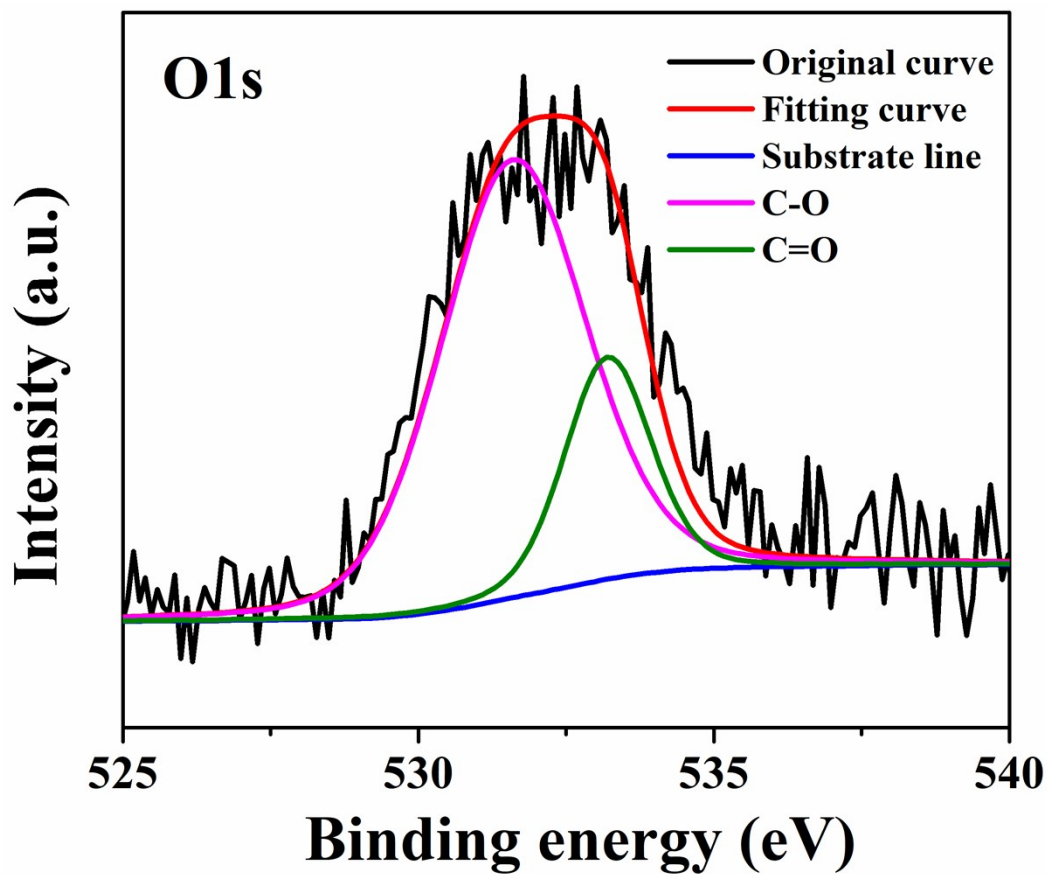

**Fig. S6** High-resolution X-ray photoelectron spectroscopy (XPS) of O1s region for S<sub>12</sub> sample.



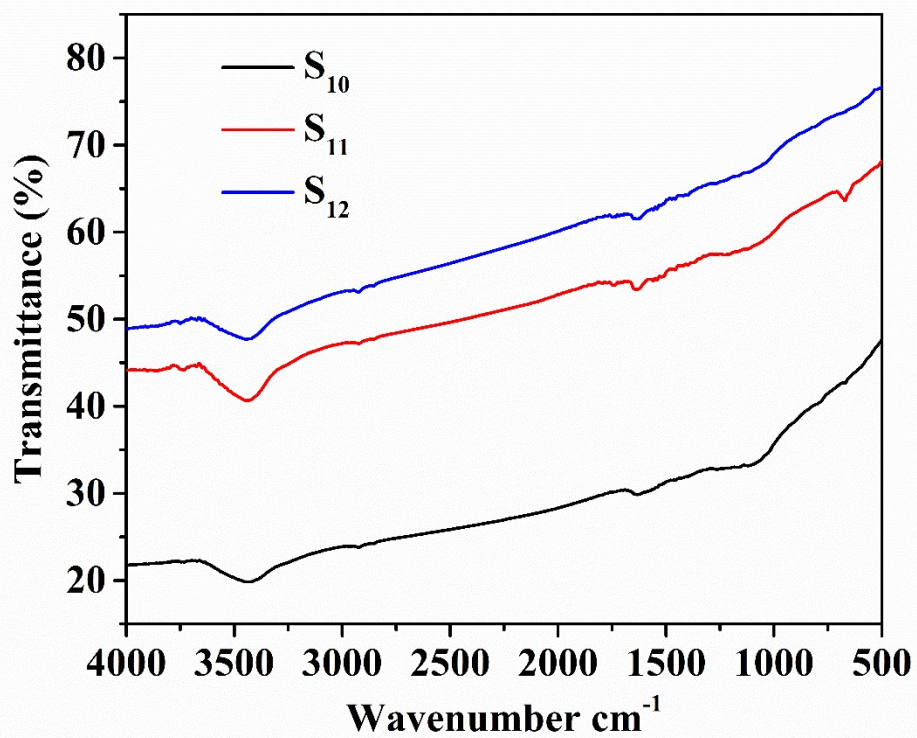

Fig. S7 FT-IR analysis of the obtained materials.[S6, S7]

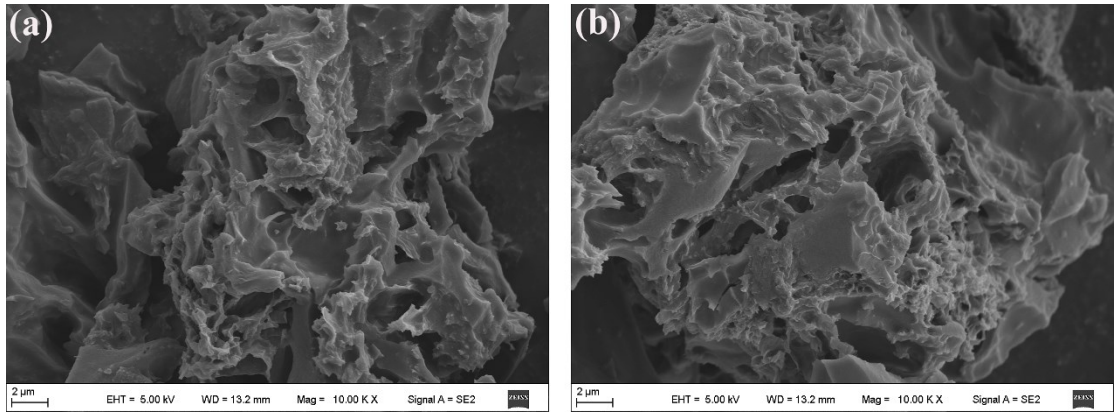

**Fig. S8** The SEM of S<sub>12</sub> after cycling.

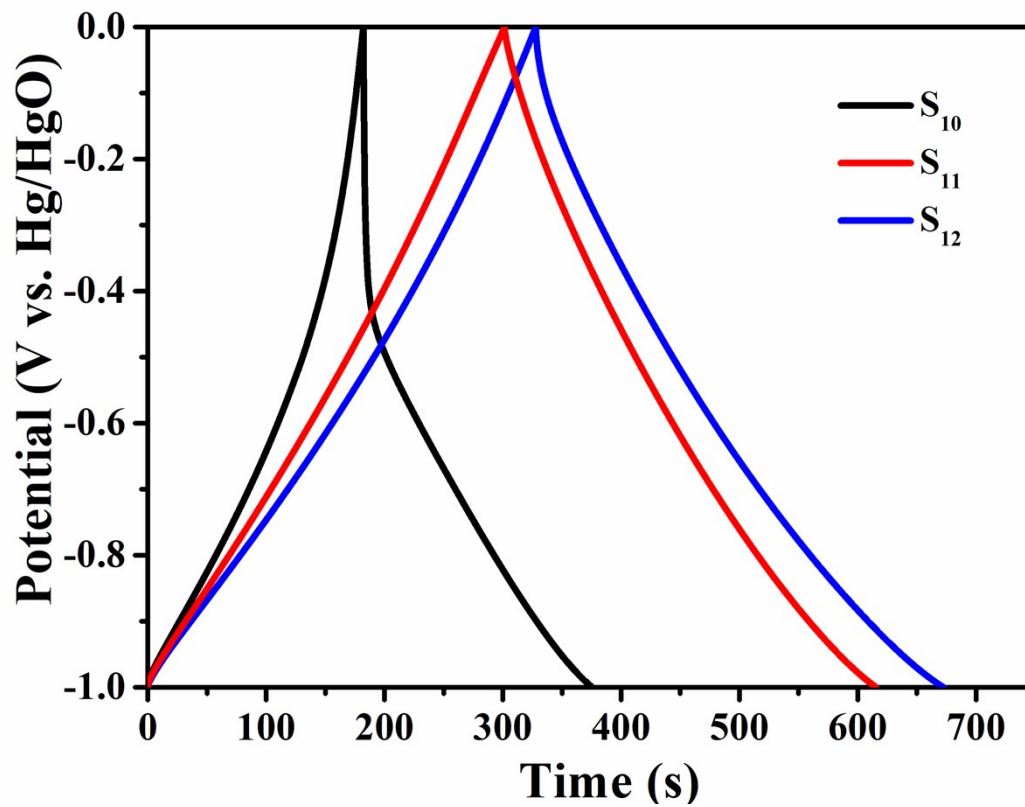

Fig. S9 GCDs patterns of S<sub>10</sub>, S<sub>11</sub>, S<sub>12</sub> electrode at current density of 0.5 A g<sup>-1</sup>.

## References

- S1 S. Sambasivam, C. V. V. M. Gopi, H. M. Arbi, Y. A. Kumar, H. J. Kim, S. A. Zahmi, I. M.Obaidat, Binder-free hierarchical core-shell-like CoMn<sub>2</sub>O<sub>4</sub>@MnS nanowire arrays on nickel foam as a battery-type electrode material for high-performance supercapacitors. *J. Energy Storage* 36 (2021) 102377.
- S2 Y. A. Kumar, S. Singh, D. K. Kulurumotlakatla, H. J. Kim, A MoNiO<sub>4</sub> flower-like electrode material for enhanced electrochemical properties via a facile chemical bath deposition method for supercapacitor applications. *New J. Chem.* 44 (2020) 522-529.
- S3 Y. S. Lee, Y. A. Kumar, S. Sambasivam, S. A. Hira, K. Zeb, W. Uddin, P. R. S. Reddy, K. D. Kumar, I. M.Obaidat, H. J. Kim, S. Kim, CoCu<sub>2</sub>O<sub>4</sub> nanoflowers architecture as an electrode material for battery type supercapacitor with improved electrochemical performance. *Nano-structures & Nano-Objects* 24 (2020) 100618.
- S4 Y. A. Kumar, A. E. Reddy, J. S. Bak, I. H. Cho, H. J. Kim, Facile synthesis of NF/ZnOx and NF/CoOx nanostructures for high performance supercapacitor electrode materials. *RSC Adv.* (9) 2019 21225-21232.
- S5 R. Khatoon, S. Attique, R. Liu, S. Rauf, N. Ali, L. Zhang, Y. J. Zeng, Y. Guo, Y. V. Kaneti, J. Na, H. Tang, H. Chen, Y. Tian, J. Lu, Carbonized waste milk powders as cathodes for stable lithium–sulfur batteries with ultra-large capacity and high initial coulombic efficiency. *Green Energ. Environ.* DOI: 10.1016/j.gee.2021.01.007.
- S6 Y. A. Kumar, K. D. Kumar, H. J. Kim, Reagents assisted ZnCo<sub>2</sub>O<sub>4</sub> nanomaterial for supercapacitor application. *Electrochim. Acta* 330 (2020) 135261.
- S7 Y. A. Kumar, S. Sambasivam, S. A. Hira, K. Zeb, W. Uddin, T. N. V. Krishna, K. D. Kumar, I. M.Obaidat, H. J. Kim, Boosting the energy density of highly efficient flexible hybrid supercapacitors via selective integration of hierarchical nanostructured energy materials. *Electrochim. Acta* 364 (2020) 137318.
